# Supplementary material
Source: PubMed Central journal article supplement (PMC2293955)

## Reyda, Dippold, Dotson, and Jarrett

### Supplementary Data

#### Mass Spectrometry of apoBS and holoBS Tryptic Fragments

ApoBioB and 2Fe-BioB samples were treated with 0.001% trypsin for 30 minutes. These samples are identical to those shown in Figure 2, lane 6. Matrix-assisted laser-desorption ionization time-of-flight (MALDI-TOF) spectra were recorded on a CIPHERGEN PBSIIC mass spectrometer. Spectra were collected by averaging 100 spectra using a laser energy of 200 and the sensitivity set at 10. Digests were diluted 1:1, 1:5, 1:10, and 1:50 in either  $\alpha$ -cyano-4-hydroxycinnamic acid (for peptide fragments from 1-9 kD) or sinnapinic acid (for fragments from 10-100 kD). The concentration of both matrices was 3.5 mg/mL (50:50:0.1 acetonitrile/water/TFA). In separate controls, samples were desalted using Millipore Ziptips using the manufacturers protocols, but this did not improve the results.

A kinetic analysis of the major bands in Figure 2 suggested that all of the major bands likely derive from a single cleavage of full length protein. We generated a table of all fragments that could result from either one or two tryptic cleavages of the full length sequence and compared these to the fragments detected by MALDI mass spectrometry. Assignments are tabulated below. There appears to be some cleavage of 2-3 residues from the N-terminus. The protein for these experiments was His<sub>6</sub>-BioB with a TEV protease site that had been treated with TEV protease and repurified. The predicted N-terminal sequence (NH<sub>2</sub>-GSAHRP....., M<sub>av</sub> = 38661) appears to have been shortened by either 2 residues (NH<sub>2</sub>-AHRP....., M<sub>av</sub> = 38517) or three residues (NH<sub>2</sub>-HRP....., M<sub>av</sub> = 38446). The 2 residue shortened protein is identical to the native enzyme after in vivo removal of the N-terminal formyl-Met. Some of the tryptic fragments appear to match best to further cleavage of these 2-3 residue-truncated sequences. The major bands detected correspond best to cleavage at Arg66, Lys68, Arg169, Arg246, and Arg328.

| Major Bands on SDS PAGE |       |          |            |               |           |              |            |
|-------------------------|-------|----------|------------|---------------|-----------|--------------|------------|
|                         | Rf    | estim MW | assignment | sequence      | Mass Spec | MS Intensity | calc avg M |
| Holo                    | 0.565 | 39       | 1-347      | GSAH --> AAAL | 38659.3   | 48.6         | 38660.6    |
|                         |       |          | 2-347      | AHRP-->AAAL   | 38482.6   | 56.1         | 38516.5    |
|                         |       |          | 3-347      | HRP-->AAAL    |           |              | 38445.5    |
| P1                      | 0.578 | 36       | 2-328      | AHRP-->QQQR   | 36389.1   | 23.9         | 36405.2    |
|                         |       |          | 3-328      | HRP-->QQQR    |           |              | 36334.2    |
| P2                      | 0.616 | 30       | 66-347     | YKTG-->AAAL   | 31205.6   | 7.3          | 31052.4    |
|                         |       |          | 68-347     | TGLE-->AAAL   | 30953     | 7.6          | 30761.0    |
| P3                      | 0.638 | 27       | 1-246      | GSAH-->DFIR   | 27357.8   | 5.8          | 27386.8    |
|                         |       |          | 3-246      | HRP-->DFIR    | 27085.6   | 7.4          | 27171.7    |
| P4                      | 0.707 | 19       | 169-347    | TYQE-->AAAL   | 19511.9   | 22.6         | 19564.3    |
| P5                      | 0.737 | 17       | 1-168      | GSAH-->ITTR   | 19059.1   | 15.9         | 19096.2    |
| P6                      | 0.862 | 10       | 247-347    | TIAV-->AAAL   | 11517.7   | 60.9         | 11273.8    |
| Small Fragments         | ~1    | ≤7       | 1-67       | GSAH-->SRYK   | 7901.4    | 11.4         | 7900.0     |
|                         |       |          | 1-65       | GSAH-->QSSR   | 7602.2    | 16.6         | 7608.0     |

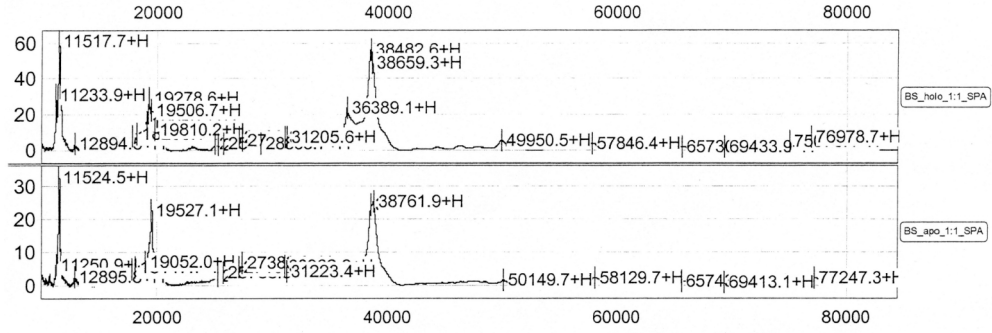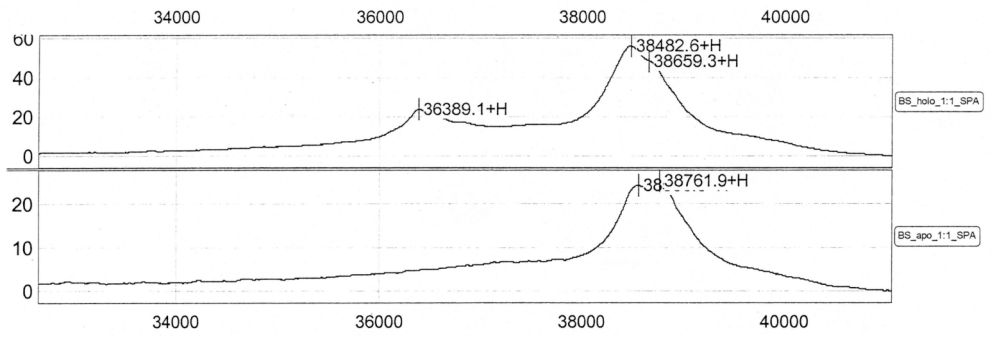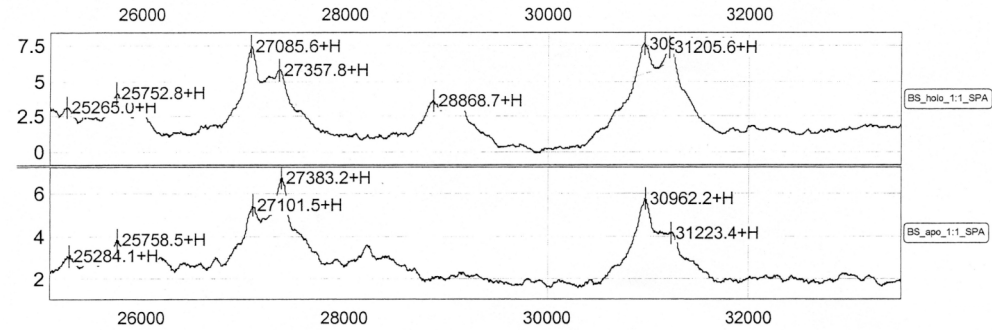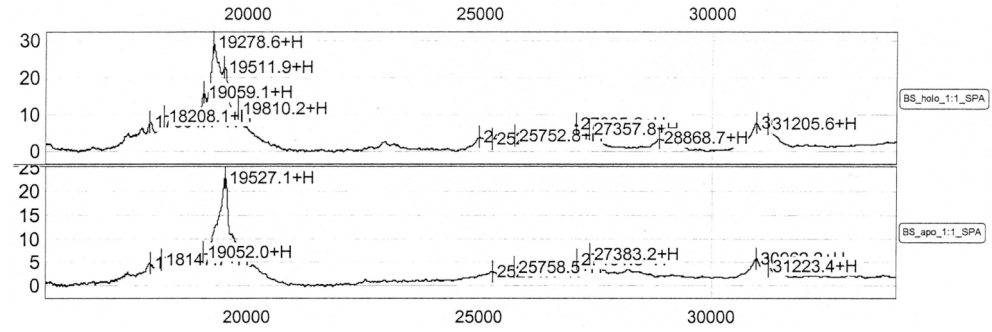

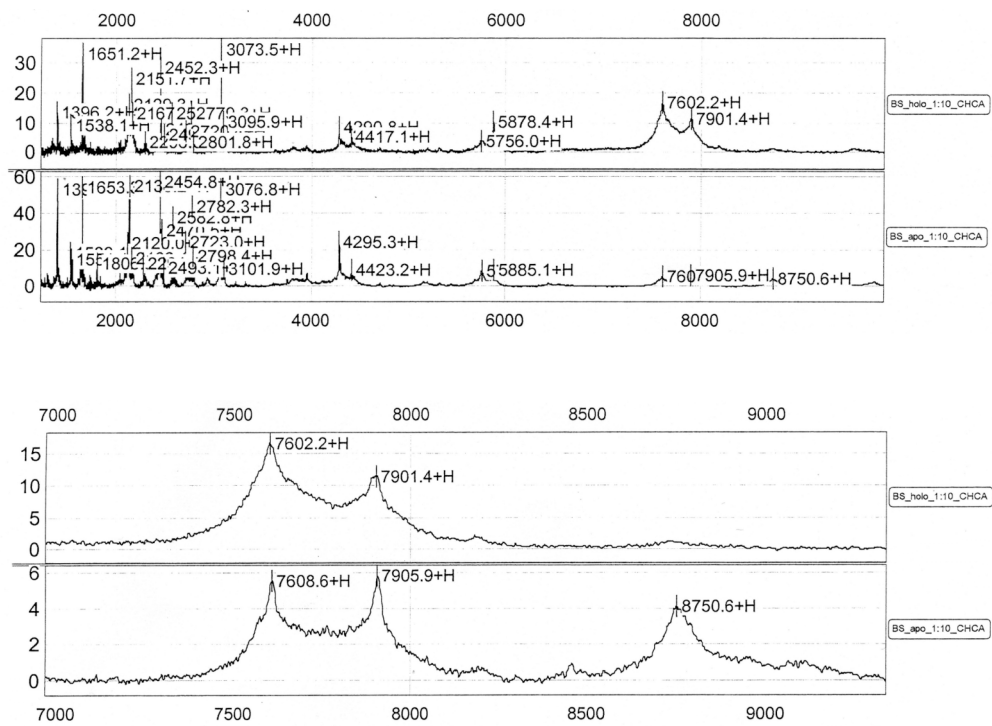

Supplement: NIHMS42370-supplement-01.pdf [file NIHMS42370-supplement-01.pdf]
